# Supplementary material for: Transcriptional coregulator Ess2 controls survival of post-thymic CD4+ T cells through the Myc and IL-7 signaling pathways
Source: PubMed Central journal article supplement — J Biol Chem. 2022 Aug 3;298(9):102342. doi: 10.1016/j.jbc.2022.102342 (PMC9436822; doi:10.1016/j.jbc.2022.102342), 2022-08-03
Supplement: mmc4.pdf [file mmc4.pdf]

# Figure S1

## A

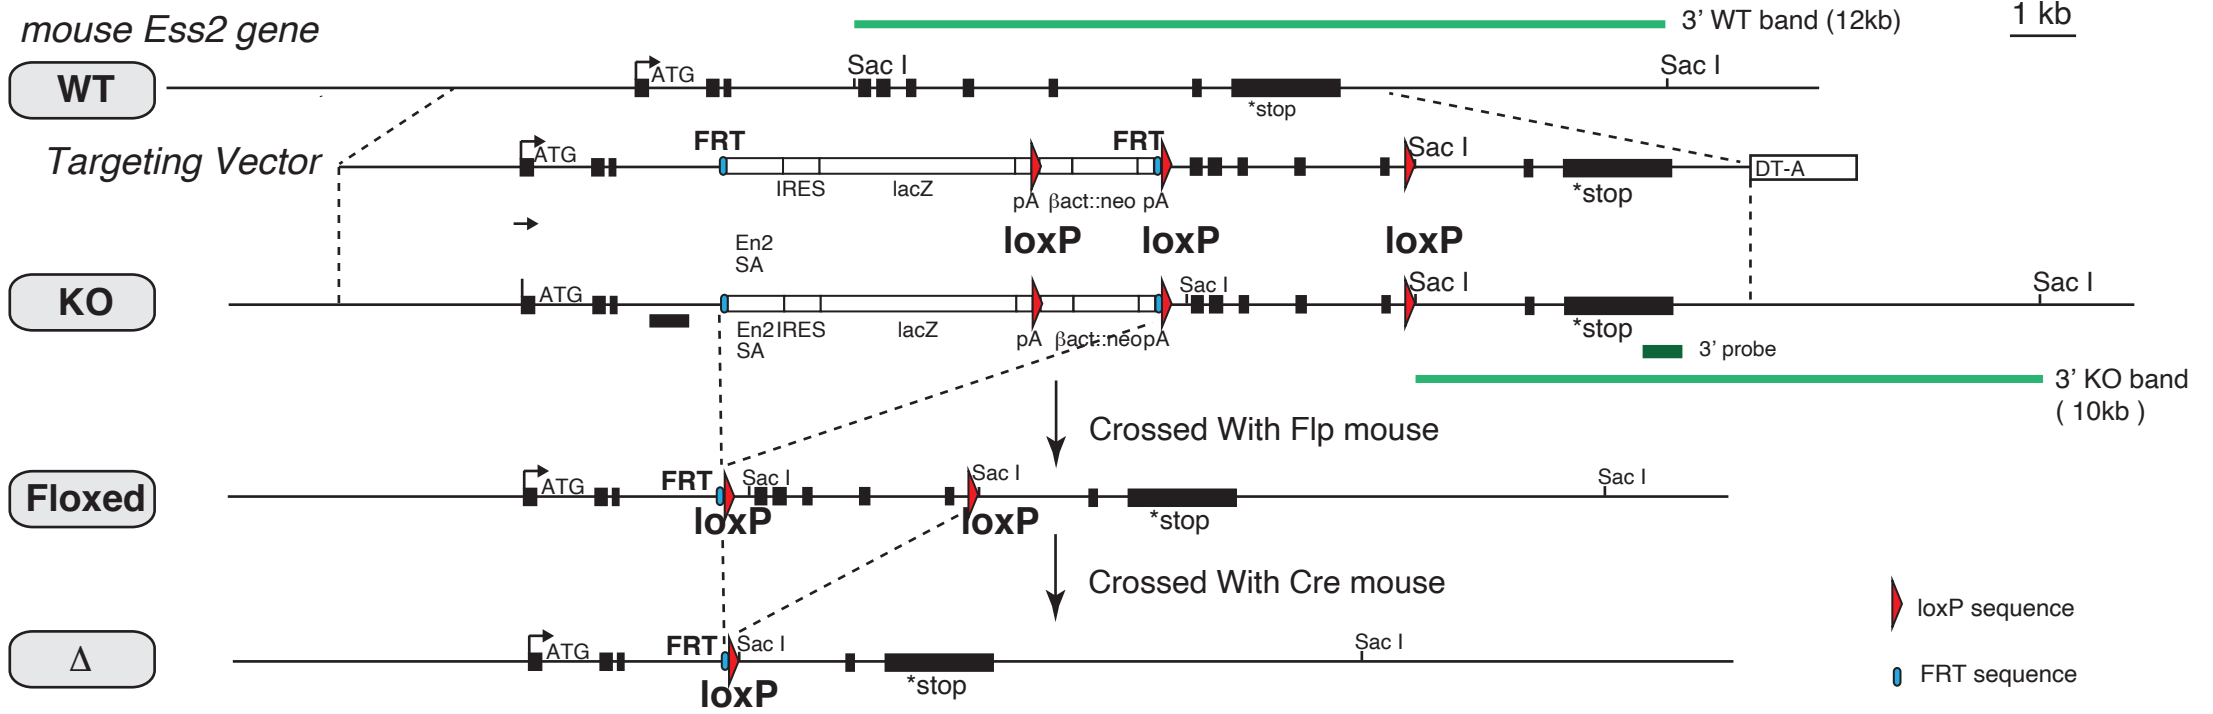

## B

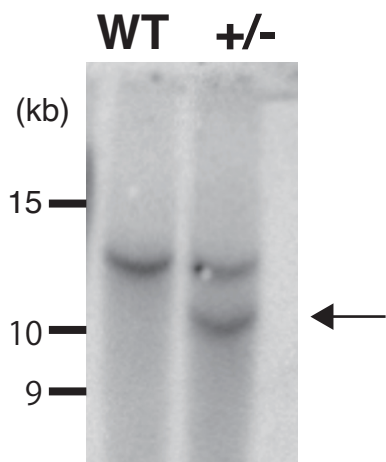

## C

| WT | +/- | -/- |
|----|-----|-----|
| 9  | 23  | 0   |

Figure S1.

A, Map of the *Ess2* targeting vector and strategy for generating knockout and floxed mice on *Ess2*.

B, Southern blotting by *Ess2* 3' probe. 3' KO band is only shown in the *Ess2*<sup>+/-</sup> mouse (arrow).

C, Result of mating between *Ess2*<sup>+/-</sup> mice. No *Ess2*<sup>-/-</sup> mice were born. Number of crosses is 6 and the average number of pups were 5.
