# Supplementary material for: Transcriptional coregulator Ess2 controls survival of post-thymic CD4+ T cells through the Myc and IL-7 signaling pathways
Source: PubMed Central journal article supplement — J Biol Chem. 2022 Aug 3;298(9):102342. doi: 10.1016/j.jbc.2022.102342 (PMC9436822; doi:10.1016/j.jbc.2022.102342), 2022-08-03
Supplement: mmc6.pdf [file mmc6.pdf]

### Figure S3

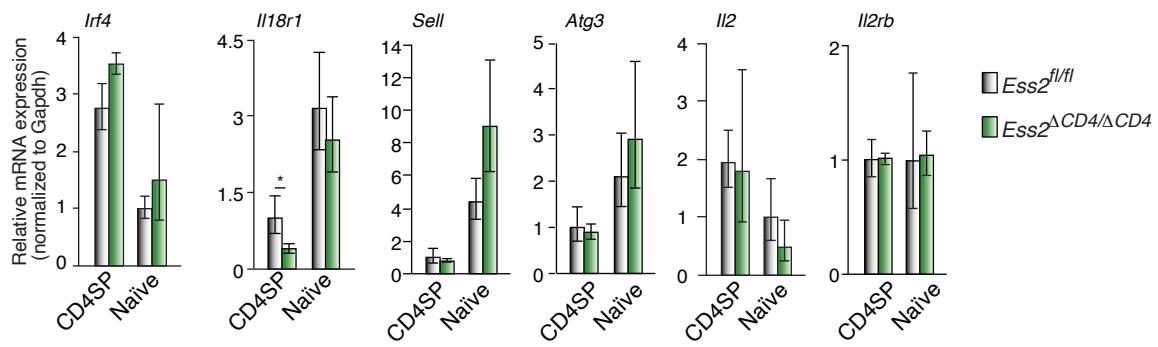

Figure S3.

RT-qPCR of CD4SP-thymocyte- and naïve-T-cell-related genes. 3-5 mice were used in each experiment. \* $p < 0.05$
