# Supplementary material for: Transcriptional coregulator Ess2 controls survival of post-thymic CD4+ T cells through the Myc and IL-7 signaling pathways
Source: PubMed Central journal article supplement — J Biol Chem. 2022 Aug 3;298(9):102342. doi: 10.1016/j.jbc.2022.102342 (PMC9436822; doi:10.1016/j.jbc.2022.102342), 2022-08-03
Supplement: mmc7.pdf [file mmc7.pdf]

## Figure S4

**A**

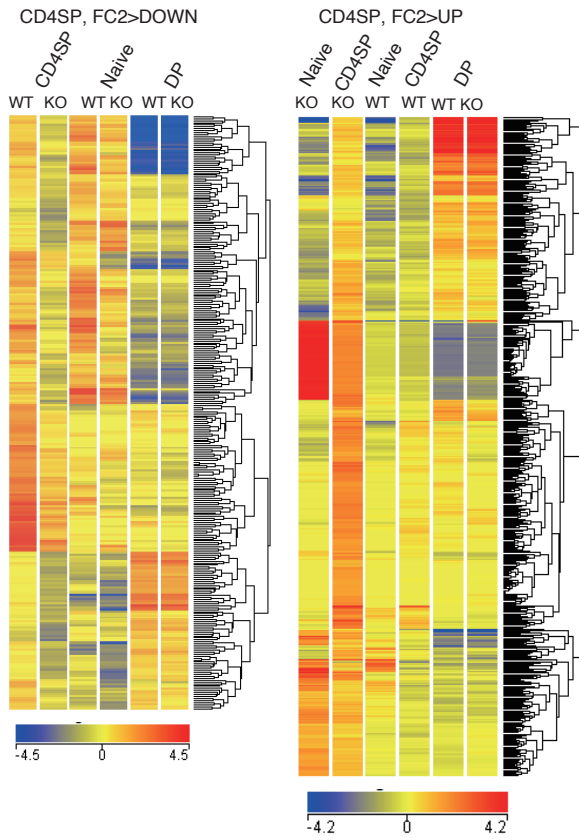

**B**

| Gene         | Value                       |                                 | Fold_change<br>(log2) | q_value |
|--------------|-----------------------------|---------------------------------|-----------------------|---------|
|              | <i>Ess2<sup>fl/fl</sup></i> | <i>Ess2<sup>ΔCD4/ΔCD4</sup></i> |                       |         |
| <i>CD4SP</i> |                             |                                 |                       |         |
| <i>Cxcr3</i> | 2.72                        | 0.59                            | -2.19                 | 0.020   |
| <i>Cxcr6</i> | 7.90                        | 1.94                            | -2.02                 | 8.E-03  |
| <i>Ctla4</i> | 19.41                       | 11.07                           | -0.81                 | 9.E-04  |
| <i>Cd3g</i>  | 292.38                      | 181.90                          | -0.68                 | 9.E-04  |
| <i>Il7r</i>  | 52.56                       | 37.09                           | -0.50                 | 9.E-04  |
| <i>Ldha</i>  | 123.60                      | 86.93                           | -0.51                 | 9.E-04  |
| <i>Naive</i> |                             |                                 |                       |         |
| <i>Il7r</i>  | 25.95                       | 19.50                           | -0.41                 | 0.015   |
| <i>Ahnak</i> | 2.49                        | 0.96                            | -1.37                 | 5.E-05  |
| <i>Ctla4</i> | 5.73                        | 2.75                            | -1.06                 | 6.E-03  |
| <i>Junb</i>  | 259.88                      | 165.12                          | -0.65                 | 6.E-04  |
| <i>Cd3g</i>  | 87.82                       | 56.03                           | -0.65                 | 6.E-04  |
| <i>Ikbkb</i> | 10.00                       | 7.59                            | -0.40                 | 0.046   |

Figure S4.

A, Heatmap of genes with over a two-fold change (FC) expression in CD4SP thymocytes from *Ess2<sup>fl/fl</sup>* and *Ess2<sup>ΔCD4/ΔCD4</sup>* mice.

B, Representative scores of a cuffdiff analysis of CD4SP-thymocyte- and naïve-Tcell-related genes. 3 mice were used in each experiment.
