# Supplementary material for: Transcriptional coregulator Ess2 controls survival of post-thymic CD4+ T cells through the Myc and IL-7 signaling pathways
Source: PubMed Central journal article supplement — J Biol Chem. 2022 Aug 3;298(9):102342. doi: 10.1016/j.jbc.2022.102342 (PMC9436822; doi:10.1016/j.jbc.2022.102342), 2022-08-03
Supplement: mmc8.pdf [file mmc8.pdf]

## Figure S5

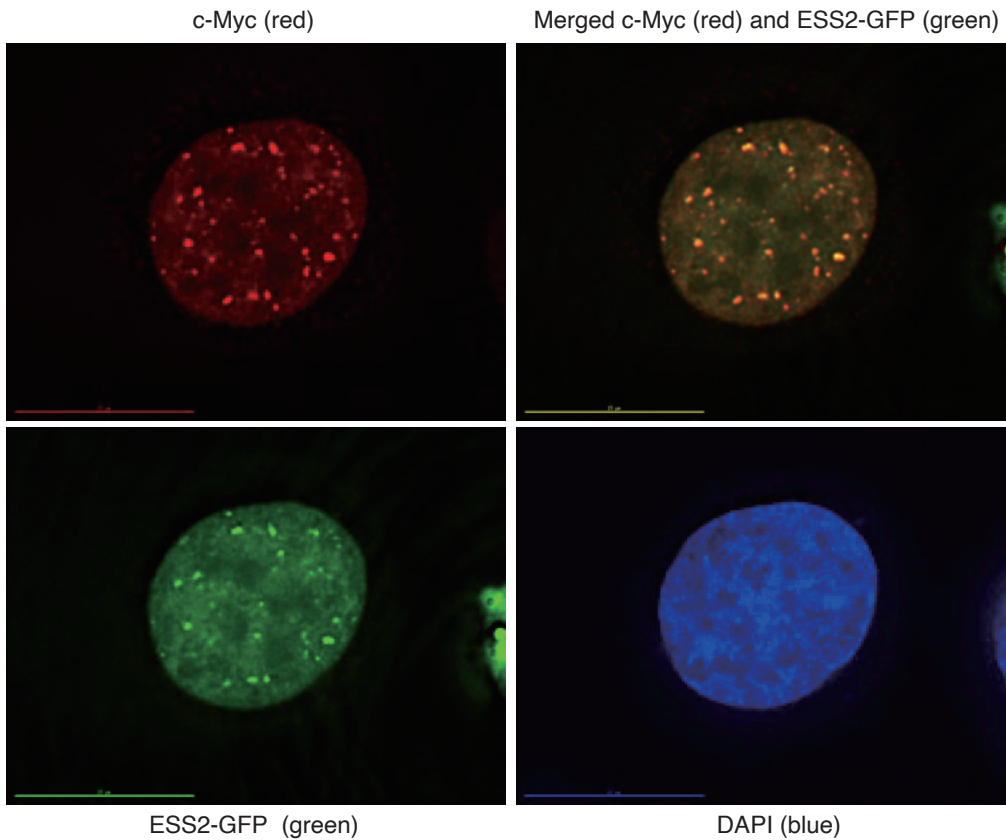

### Figure S5

Fluorescent immunostaining of c-Myc and ESS2-GFP.

After transfected c-Myc and ESS2-GFP expression vectors in U2OS cells, Cells were fixed in 4% paraformaldehyde for 15 min at room temperature and stained with c-Myc antibody as previously described (9). For observation, an oil-immersion objective lens (PLAPON60xOSC/NA1.40; Olympus) was used on the DeltaVision microscope system (GE Healthcare Life Sciences). The images were analyzed by using SoftWoRx 7.0.0 software (GE Healthcare Life Science). Bar scale is 15 $\mu$ m.
