# Supplementary material for: Transcriptional coregulator Ess2 controls survival of post-thymic CD4+ T cells through the Myc and IL-7 signaling pathways
Source: PubMed Central journal article supplement — J Biol Chem. 2022 Aug 3;298(9):102342. doi: 10.1016/j.jbc.2022.102342 (PMC9436822; doi:10.1016/j.jbc.2022.102342), 2022-08-03
Supplement: mmc9.pdf [file mmc9.pdf]

# Figure S6

**A**

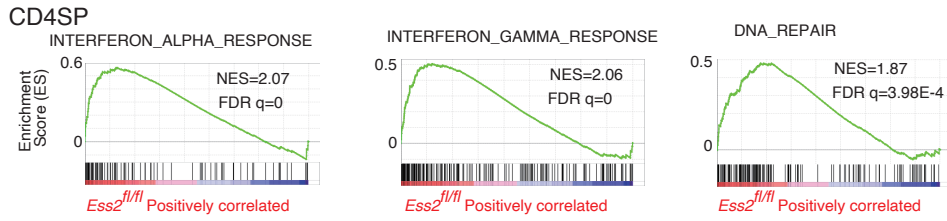

**B**

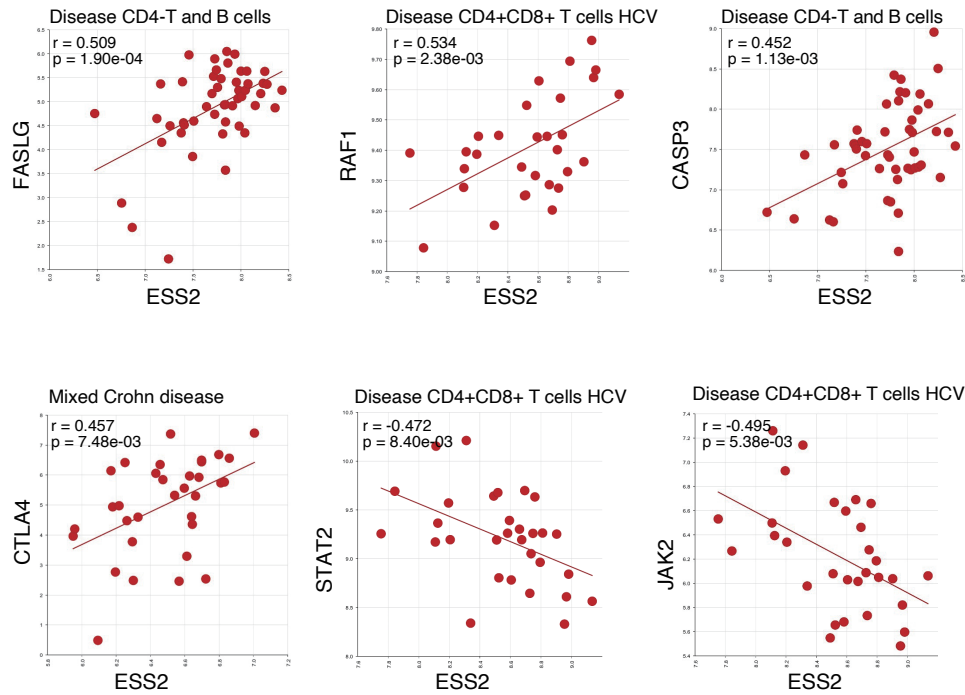

Figure S6.

A, Other gene sets positively correlated by a GSEA analysis in CD4SP cells (related to Fig. 5B). B, Correlation between human ESS2 levels and genes identified in a GSEA analysis using the R2 database (related to Fig. 5C). Used data sets are shown in each graph.
