# Supplementary material for: Transcriptional coregulator Ess2 controls survival of post-thymic CD4+ T cells through the Myc and IL-7 signaling pathways
Source: PubMed Central journal article supplement — J Biol Chem. 2022 Aug 3;298(9):102342. doi: 10.1016/j.jbc.2022.102342 (PMC9436822; doi:10.1016/j.jbc.2022.102342), 2022-08-03
Supplement: mmc10.pdf [file mmc10.pdf]

Figure S7

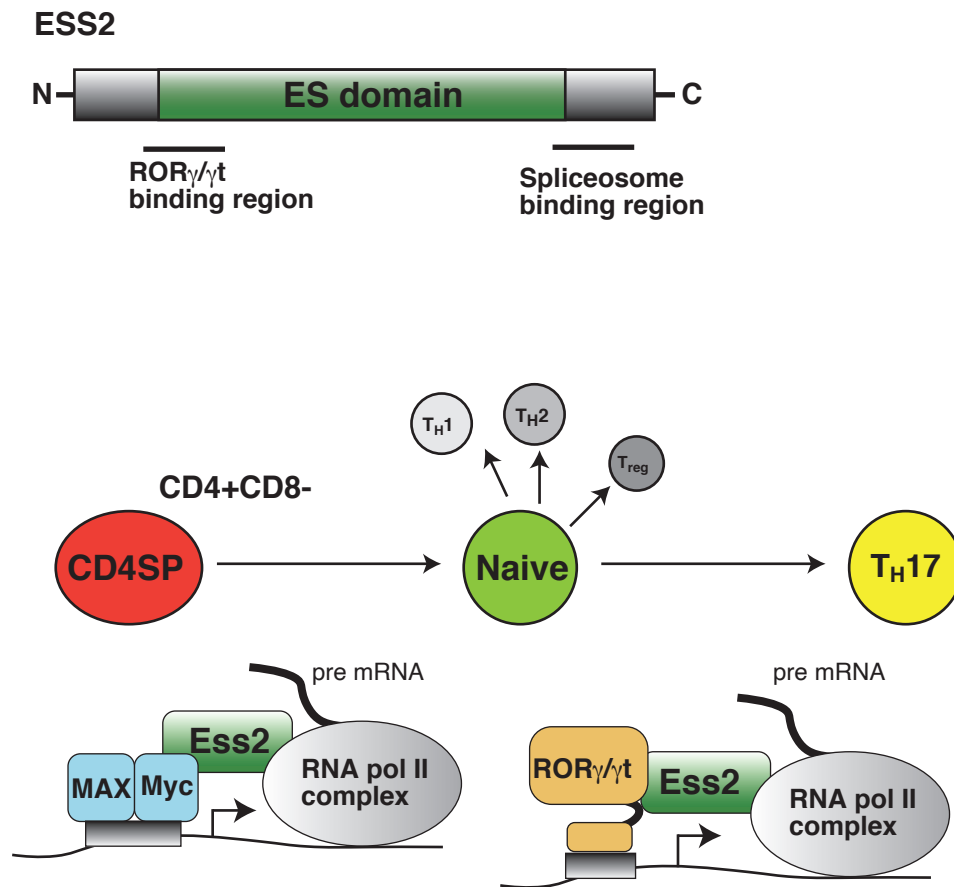

Figure S7

Schematic illustration of ESS2 function in T cells. Upper panel: The structure of ESS2, including the conserved ES domain consisting of a coiled-coil domain, and depicting the association of ESS2 with ROR $\gamma/\gamma$ t at the N-terminus and with the spliceosome at the C-terminus. Lower panel: Illustration of the functional role of ESS2 during T cell development, including the activation of MYC function in CD4SP and naive T cells by ESS2 and the function of ESS2 as a transcriptional coactivator of ROR $\gamma/\gamma$ t in TH17 cells.
