# Supplementary figures and images for: Transcriptional coregulator Ess2 controls survival of post-thymic CD4+ T cells through the Myc and IL-7 signaling pathways
Source: PubMed Central journal article supplement — J Biol Chem. 2022 Aug 3;298(9):102342. doi: 10.1016/j.jbc.2022.102342 (PMC9436822; doi:10.1016/j.jbc.2022.102342), 2022-08-03

## Figure S2

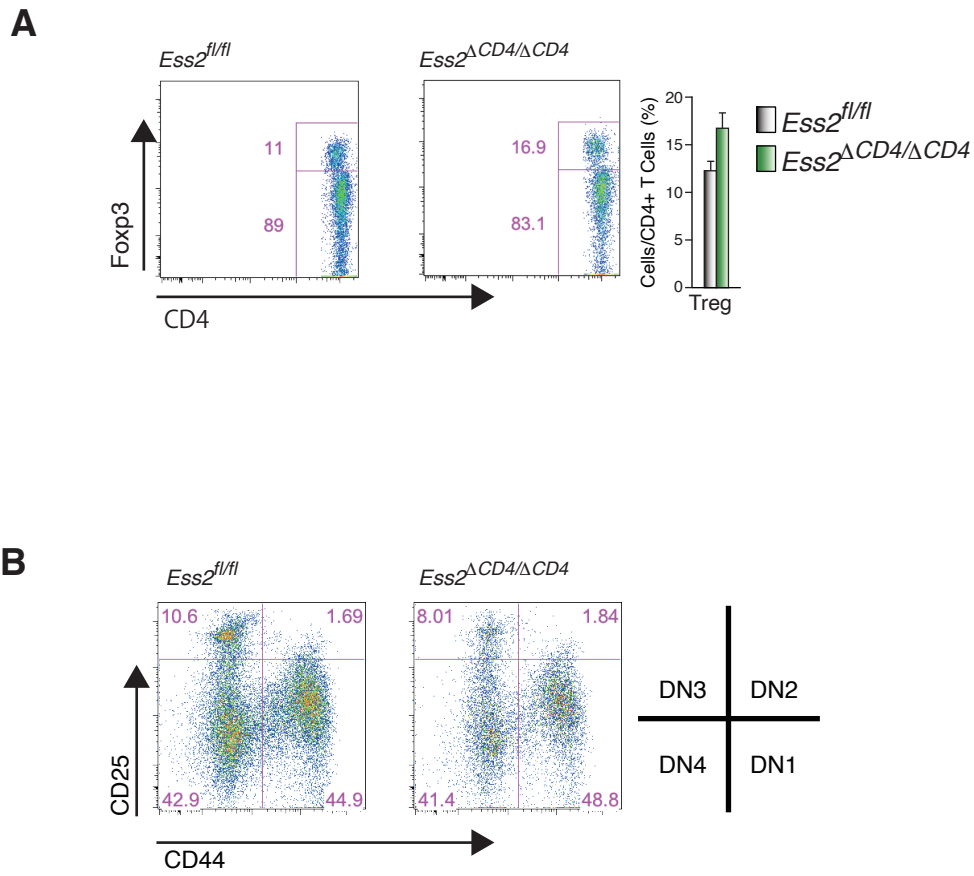

Supplement: mmc5.pdf [file mmc5.pdf]
